# Supplementary material for: Induction of necrotic cell death by oxidative stress in retinal pigment epithelial cells
Source: PubMed Central journal article supplement (PMC3877549; doi:10.1038/cddis.2013.478), 2013-12-12

## Supplemental Data

### Supplemental Figure 1

A) ARPE-19 cell viability cells determined by representative by light microscopy (upper panel) MTT crystal (lower panel) pictures after treatment with different concentration of H<sub>2</sub>O<sub>2</sub> for 24 hours.

B) ARPE-19 cell viability cells determined by representative by light microscopy (upper panel) MTT crystal (lower panel) pictures after treatment with different concentration of tBHP for 24 hours.

### Supplemental Figure 2

Light microscopy pictures showing morphological changes of ARPE-19 cells at 0, 4 and 8 hours after 300 μM H<sub>2</sub>O<sub>2</sub> (A-C), 500 μM H<sub>2</sub>O<sub>2</sub> (D-E) or 150 μM tBHP (G-I) treatment.

### Supplemental Figure 3

DAPI staining of ARPE-19 cell nuclei at 8 hours after 300 μM or 500 μM H<sub>2</sub>O<sub>2</sub>, or 150 μM tBHP treatment (C-E). UV-irradiated HeLa cells were used as positive control for apoptosis (B). Arrow marked apoptotic chromatin condensation and nuclear fragmentation in (B).

### Supplemental Figure 4

Rescue of HeLa cell death in response to UV irradiation by z-VAD.

### Supplemental Figure 5

ARPE-19 cell survival in response to prolonged low oxidative stress. RPE cells were treated with 100-200 μM H<sub>2</sub>O<sub>2</sub> or 75-100 μM tBHP 2 hours/day for up to 4 days. Cell survival was measured by MTT assay.



Supplemental Figure 1

A

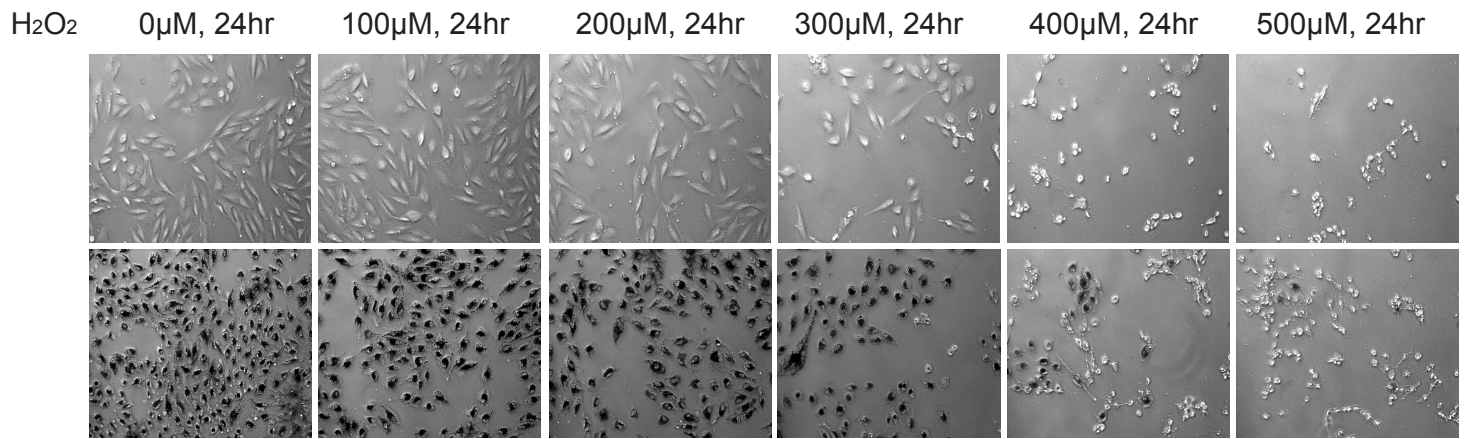

B

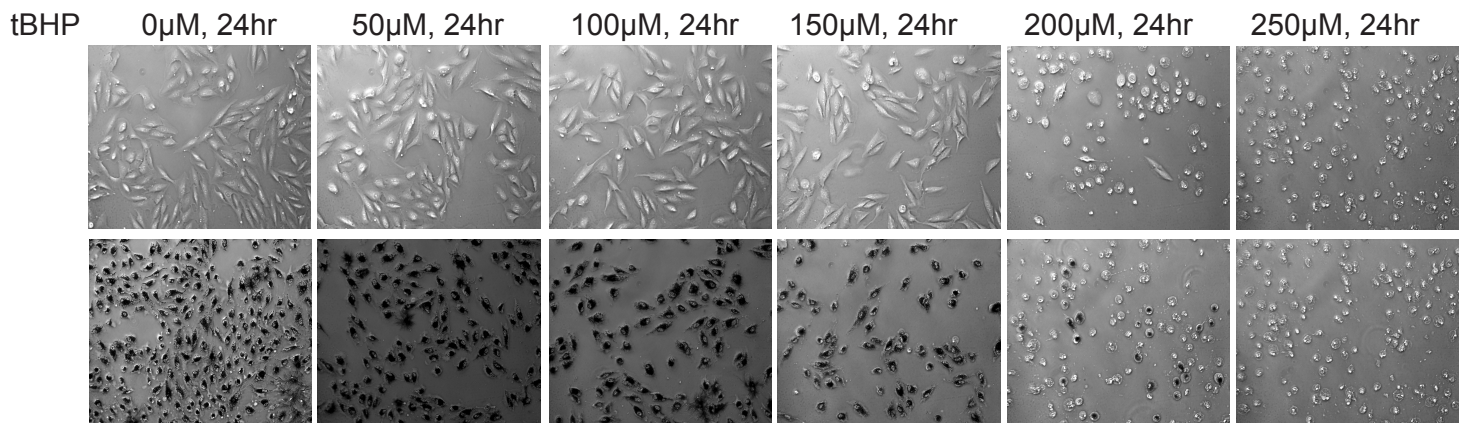

Supplemental Figure 2

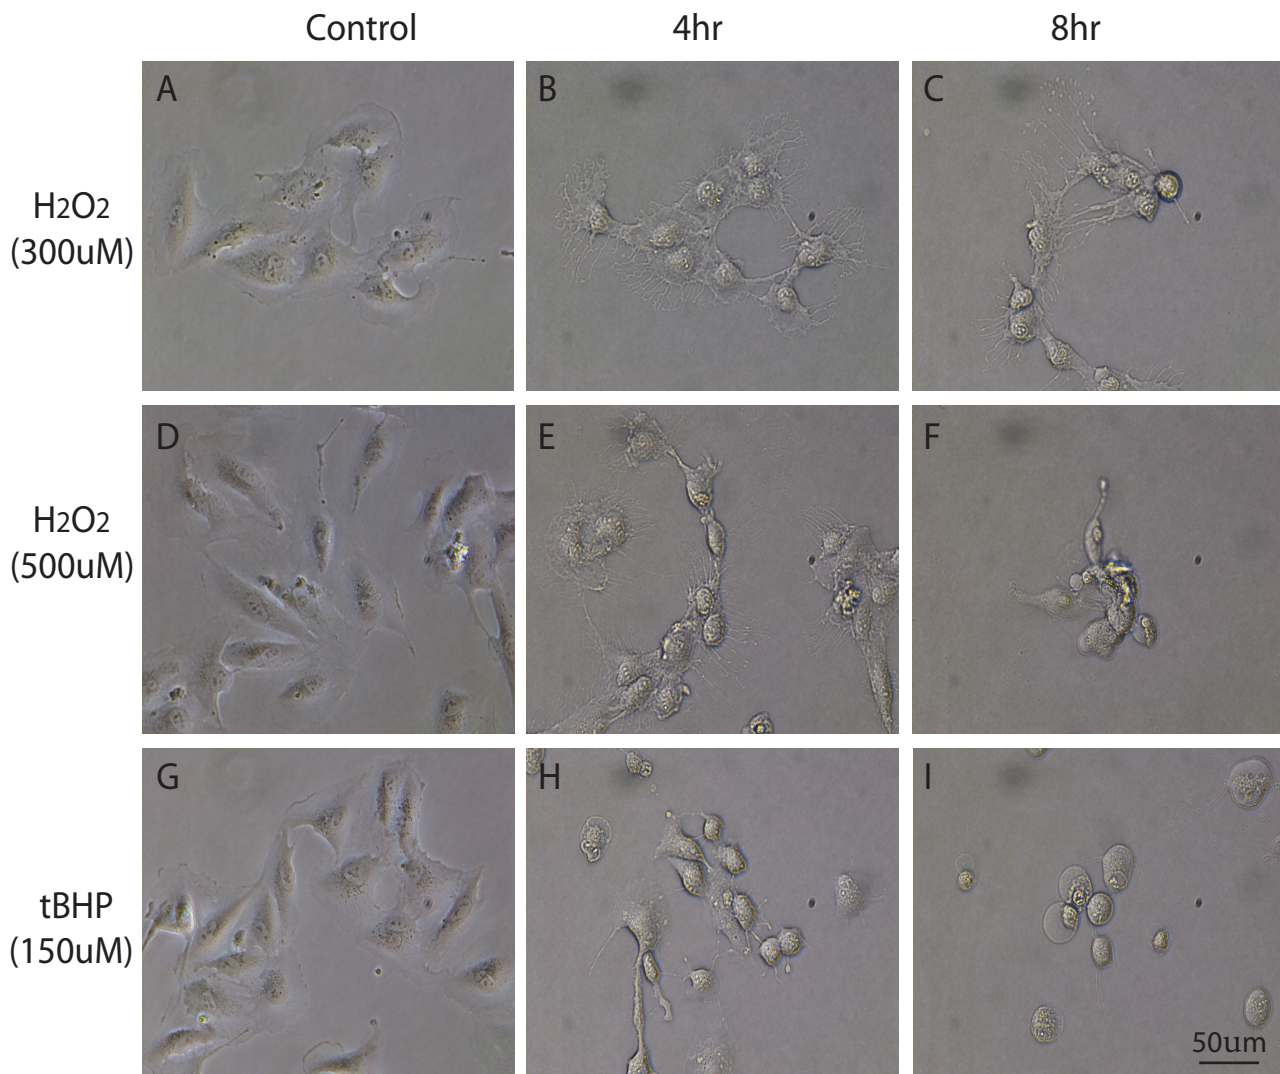

Supplemental Fig. 3

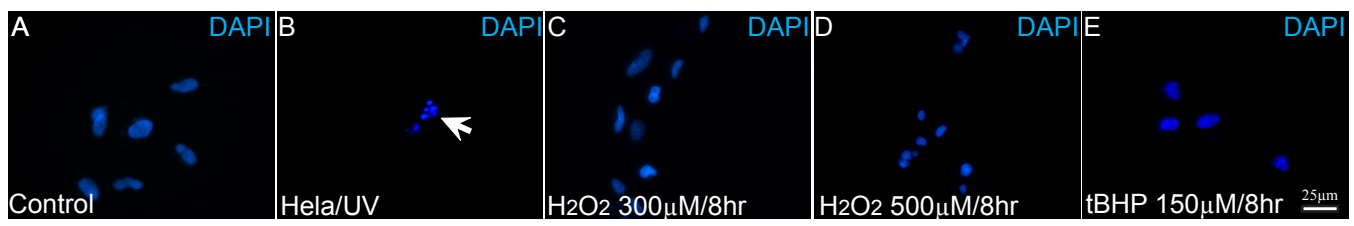

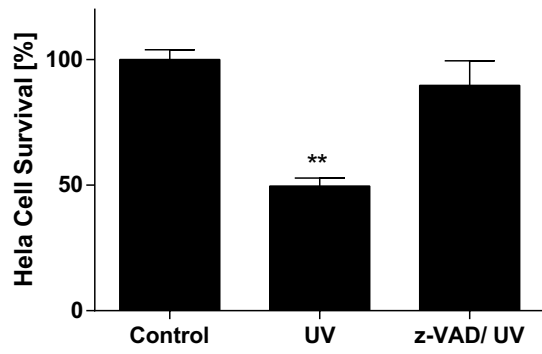

Supplemental Figure 5

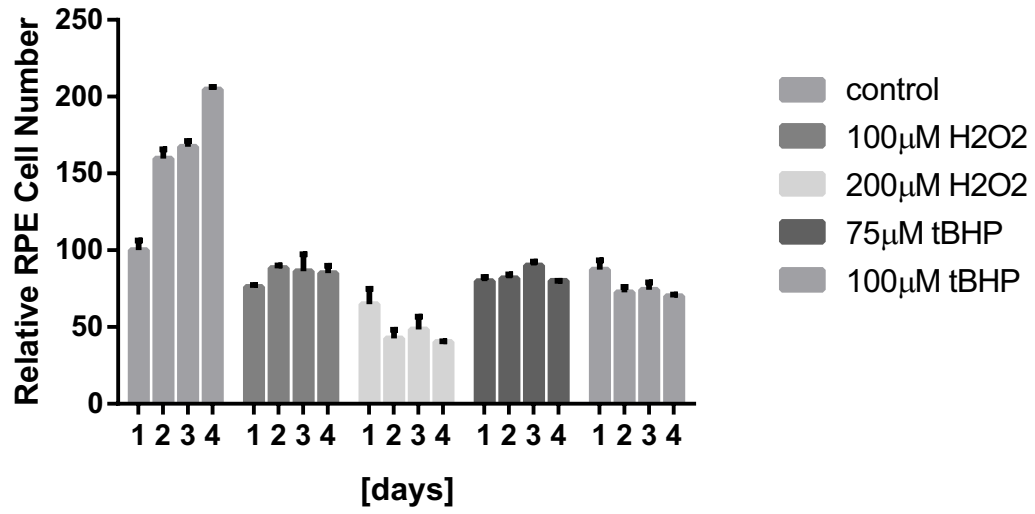

Supplement: cddis2013478x1.pdf [file cddis2013478x1.pdf]
